# Supplementary material for: Diagnostic Performance of a Fecal Immunochemical Test-Based Colorectal Cancer Screening Program According to Ambient Temperature and Humidity
Source: MDPI journal article supplement (doi:10.3390/cancers14051153), 2022-02-23
Supplement: s1 [file s1]

# Diagnostic Performance of a Fecal Immunochemical Test-Based Colorectal Cancer Screening Program According to Ambient Temperature and Humidity

Gemma Ibáñez-Sanz; Núria Milà; Núria Vives; Carmen Vidal; Gemma Binefa; Judith Rocamora; Carmen Atencia; Víctor Moreno; Rebeca Sanz-Pamplona; Montse Garcia and on behalf of the MSIC-SC research group

**Table S1.** Temperature and storage time of the faecal immunochemical tests

| Stage                            | Temperature         | Controlled temperature | Storage time <sup>1</sup> |
|----------------------------------|---------------------|------------------------|---------------------------|
| Sample collection                | 2-8°C <sup>2</sup>  | No                     |                           |
| Delivery to pharmacy             | Ambient temperature | No                     | Maximum 3 days            |
| Pharmacy                         | 2-8°C <sup>3</sup>  | Yes                    | Maximum 2 days            |
| Transport to dispenser warehouse | 2-8°C <sup>4</sup>  | Yes                    |                           |
| Dispenser warehouse              | 2-8°C <sup>4</sup>  | Yes                    | Maximum 3 days            |
| Transport to laboratory          | 2-8°C <sup>4</sup>  | Yes                    | Maximum 1 day             |
| Laboratory                       | 2-8°C <sup>4</sup>  | Yes                    | Maximum 3 days            |

<sup>1</sup>Maximum time according to protocol; <sup>2</sup>In case of not immediate return; <sup>3</sup>In compliance with Decree 168/1990, 3 July, which establishes the technical-sanitary requirements that must be met; <sup>4</sup>In compliance with the corresponding good manufacturing practices as well as Royal Decree 782/2013 11 October on the distribution of medicines for human use.

**Table S2a.** Baseline characteristics of participants according to temperature

|                        | Maximum ambient temperature |               |
|------------------------|-----------------------------|---------------|
|                        | ≤24 °C                      | >24°C         |
|                        | N=63964                     | N=28309       |
| Sex                    |                             |               |
| Female                 | 35130 (54.9%)               | 15844 (56.0%) |
| Male                   | 28834 (45.1%)               | 12465 (44.0%) |
| Age (years)            |                             |               |
| 50-59                  | 31497 (49.2%)               | 13083 (46.2%) |
| 60-69                  | 32467 (50.8%)               | 15226 (53.8%) |
| Screening episode      |                             |               |
| Initial                | 38049 (59.5%)               | 15811 (55.9%) |
| Successive             | 25915 (40.5%)               | 12498 (44.1%) |
| Socioeconomic Score    |                             |               |
| 0-39 (least deprived)  | 6054 (9.5%)                 | 995 (3.5%)    |
| 39-51                  | 31919 (49.9%)               | 3659 (12.9%)  |
| 52-100 (most deprived) | 25991 (40.6%)               | 23655 (83.6%) |

**Table S2b.** Baseline characteristics of participants according to relative humidity

|                        | Maximum ambient humidity |              |
|------------------------|--------------------------|--------------|
|                        | ≤89%                     | >89%         |
|                        | N=81379                  | N=10894      |
| Sex                    |                          |              |
| Female                 | 44986 (55.3%)            | 5988 (55.0%) |
| Male                   | 36393 (44.7%)            | 4906 (45.0%) |
| Age (years)            |                          |              |
| 50-59                  | 38978 (47.9%)            | 5602 (51.4%) |
| 60-69                  | 42401 (52.1%)            | 5292 (48.6%) |
| Screening episode      |                          |              |
| Initial                | 48495 (59.6%)            | 5365 (49.2%) |
| Successive             | 32884 (40.4%)            | 5529 (50.8%) |
| Socioeconomic Score    |                          |              |
| 0-39 (least deprived)  | 5610 (6.9%)              | 1439 (13.2%) |
| 39-51                  | 28262 (34.7%)            | 7316 (67.2%) |
| 52-100 (most deprived) | 47507 (58.4%)            | 2139 (19.6%) |

**Table S3.** Logistic regression of the probability of positive screening tests by quarter year (95% CI)

|                                              | Number of FITs<br>N=5048 | OR <sup>2</sup> | 95% CI    | P-value |
|----------------------------------------------|--------------------------|-----------------|-----------|---------|
| Sex                                          |                          |                 |           |         |
| Female                                       | 2185 (43.3%)             | 1.00            |           | <0.001  |
| Male                                         | 2863 (56.7%)             | 1.67            | 1.58-1.77 |         |
| Age <sup>1</sup> (years)                     | 60.7 (5.8)               | 1.03            | 1.03-1.04 | <0.001  |
| Screening episode                            |                          |                 |           |         |
| Initial                                      | 3306 (65.5%)             | 1.00            |           | <0.001  |
| Successive                                   | 1742 (34.5%)             | 0.68            | 0.64-0.72 |         |
| Socioeconomic score <sup>1</sup> (mean (SD)) | 53.5 (10.9)              | 1.01            | 1.00-1.01 | <0.001  |
| Quarter year of FIT performance              |                          |                 |           |         |
| 1 <sup>st</sup> quarter (January-March)      | 1675 (33.2%)             | 1.00            |           |         |
| 2 <sup>nd</sup> quarter (April-June)         | 1007 (19.9%)             | 0.91            | 0.84-0.98 | 0.02    |
| 3 <sup>rd</sup> quarter (July-September)     | 449 (8.9%)               | 0.85            | 0.76-0.96 | 0.004   |
| 4 <sup>th</sup> quarter (October-December)   | 1917 (38.0%)             | 0.90            | 0.84-0.97 | 0.003   |

<sup>1</sup>Continuous variable; <sup>2</sup>All variables shown are included in the multivariate analysis. FIT: faecal immunochemical test.

**Table S4.** Logistic regression of the probability of having an advanced neoplasia diagnosed (Screen-detected CRCs, high-risk lesions and intermediate-risk lesions) by quarter year

|                                                 | No advanced<br>neoplasia<br>N=2367 | Advanced<br>neoplasia<br>N=2151 | OR <sup>2</sup> | 95% CI    | P-<br>value |
|-------------------------------------------------|------------------------------------|---------------------------------|-----------------|-----------|-------------|
| Sex                                             |                                    |                                 |                 |           |             |
| Female                                          | 1278 (54.0%)                       | 678 (31.5%)                     | 1.00            |           |             |
| Male                                            | 1089 (46.0%)                       | 1473 (68.5%)                    | 2.53            | 2.23-2.85 | <0.001      |
| Age <sup>1</sup> (mean (SD)) (years)            | 60.6 (5.8)                         | 60.8 (5.8)                      | 1.01            | 1.00-1.02 | 0.01        |
| Screening episode                               |                                    |                                 |                 |           |             |
| Initial                                         | 1422 (60.1%)                       | 1515 (70.4%)                    | 1.00            |           |             |
| Successive                                      | 945 (39.9%)                        | 636 (29.6%)                     | 0.63            | 0.56-0.72 | <0.001      |
| Socioeconomic score <sup>1</sup><br>(mean (SD)) | 53.3 (10.8)                        | 53.5 (11.1)                     | 1.00            | 1.00-1.01 | 0.38        |
| Quarter year of FIT performance                 |                                    |                                 |                 |           |             |
| 1st quarter (January-March)                     | 797 (33.7%)                        | 688 (32.0%)                     | 1.00            |           |             |
| 2nd quarter (April-June)                        | 439 (18.5%)                        | 446 (20.7%)                     | 1.17            | 0.98-1.38 | 0.08        |
| 3rd quarter (July-September)                    | 203 (8.6%)                         | 191 (8.9%)                      | 1.07            | 0.84-1.35 | 0.59        |
| 4th quarter (October-December)                  | 928 (39.2%)                        | 826 (38.4%)                     | 1.02            | 0.89-1.18 | 0.76        |

<sup>1</sup>Continuous variable; <sup>2</sup>All variables shown are included in the multivariate analysis. FIT: faecal immunochemical test
